# Supplementary material
Source: PubMed Central journal article supplement (PMC3054021)
Supplement: 1019109108_pnas.201019109SI.pdf [file 1019109108_pnas.201019109SI.pdf]

# Supporting Information

Sun et al. 10.1073/pnas.1019109108

**Table S1. Reassortants with high replication ability (replication group I)**  
Virus segments

| Virus no. | Virus name     | PB2 | PB1 | PA | HA | NP | NA | M | NS | Titer (log <sub>10</sub> pfu/mL) |
|-----------|----------------|-----|-----|----|----|----|----|---|----|----------------------------------|
|           | HB08 WT        |     |     |    |    |    |    |   |    | 8.9                              |
|           | BJ09 WT        |     |     |    |    |    |    |   |    | 7.5                              |
| 15        | r2/8           |     |     |    |    |    |    |   |    | 8.9                              |
| 6         | r8             |     |     |    |    |    |    |   |    | 8.7                              |
| 18        | r3/8           |     |     |    |    |    |    |   |    | 8.7                              |
| 48        | r1/3/5/7       |     |     |    |    |    |    |   |    | 8.7                              |
| 22        | r1/2/3         |     |     |    |    |    |    |   |    | 8.6                              |
| 124       | r1/2/3/6/7/8   |     |     |    |    |    |    |   |    | 8.6                              |
| 5         | r7             |     |     |    |    |    |    |   |    | 8.5                              |
| 20        | r5/8           |     |     |    |    |    |    |   |    | 8.5                              |
| 8         | r1/3           |     |     |    |    |    |    |   |    | 8.4                              |
| 25        | r1/2/8         |     |     |    |    |    |    |   |    | 8.4                              |
| 47        | r1/2/7/8       |     |     |    |    |    |    |   |    | 8.4                              |
| 19        | r5/7           |     |     |    |    |    |    |   |    | 8.3                              |
| 31        | r1/7/8         |     |     |    |    |    |    |   |    | 8.3                              |
| 125       | r1/2/3/5/6/8   |     |     |    |    |    |    |   |    | 8.3                              |
| 2         | r2             |     |     |    |    |    |    |   |    | 8.2                              |
| 7         | r1/2           |     |     |    |    |    |    |   |    | 8.2                              |
| 28        | r1/3/8         |     |     |    |    |    |    |   |    | 8.2                              |
| 30        | r1/5/8         |     |     |    |    |    |    |   |    | 8.2                              |
| 21        | r7/8           |     |     |    |    |    |    |   |    | 8.1                              |
| 33        | r2/3/7         |     |     |    |    |    |    |   |    | 8.1                              |
| 46        | r1/2/5/8       |     |     |    |    |    |    |   |    | 8.1                              |
| 72        | r1/3/6         |     |     |    |    |    |    |   |    | 8.1                              |
| 3         | r3             |     |     |    |    |    |    |   |    | 8                                |
| 23        | r1/2/5         |     |     |    |    |    |    |   |    | 8                                |
| 26        | r1/3/5         |     |     |    |    |    |    |   |    | 8                                |
| 27        | r1/3/7         |     |     |    |    |    |    |   |    | 8                                |
| 49        | r1/3/5/8       |     |     |    |    |    |    |   |    | 8                                |
| 70        | r6/8           |     |     |    |    |    |    |   |    | 8                                |
| 71        | r1/2/6         |     |     |    |    |    |    |   |    | 8                                |
| 127       | r1/2/3/5/6/7/8 |     |     |    |    |    |    |   |    | 8                                |
| 64        | r6             |     |     |    |    |    |    |   |    | 7.9                              |
| 69        | r6/7           |     |     |    |    |    |    |   |    | 7.9                              |
| 1         | r1             |     |     |    |    |    |    |   |    | 7.8                              |
| 11        | r1/8           |     |     |    |    |    |    |   |    | 7.8                              |
| 34        | r2/3/8         |     |     |    |    |    |    |   |    | 7.8                              |
| 44        | r1/2/3/8       |     |     |    |    |    |    |   |    | 7.8                              |
| 59        | r1/2/5/7/8     |     |     |    |    |    |    |   |    | 7.8                              |
| 62        | r1/2/3/5/7     |     |     |    |    |    |    |   |    | 7.8                              |
| 4         | r5             |     |     |    |    |    |    |   |    | 7.7                              |
| 40        | r3/7/8         |     |     |    |    |    |    |   |    | 7.7                              |
| 41        | r5/7/8         |     |     |    |    |    |    |   |    | 7.7                              |
| 55        | r2/5/7/8       |     |     |    |    |    |    |   |    | 7.7                              |
| 63        | r1/2/3/5/7/8   |     |     |    |    |    |    |   |    | 7.7                              |
| 65        | r1/6           |     |     |    |    |    |    |   |    | 7.7                              |
| 66        | r2/6           |     |     |    |    |    |    |   |    | 7.7                              |
| 73        | r1/5/6         |     |     |    |    |    |    |   |    | 7.7                              |
| 68        | r5/6           |     |     |    |    |    |    |   |    | 7.6                              |
| 29        | r1/5/7         |     |     |    |    |    |    |   |    | 7.5                              |
| 43        | r1/2/3/7       |     |     |    |    |    |    |   |    | 7.5                              |
| 45        | r1/2/5/7       |     |     |    |    |    |    |   |    | 7.5                              |
| 60        | r1/2/3/7/8     |     |     |    |    |    |    |   |    | 7.5                              |
| 61        | r1/2/3/5/8     |     |     |    |    |    |    |   |    | 7.5                              |

Table S1. Cont.

| Virus no. | Virus name   | Virus segments |      |      |      |      |      |      |      | Titer (log <sub>10</sub> pfu/mL) |
|-----------|--------------|----------------|------|------|------|------|------|------|------|----------------------------------|
|           |              | PB2            | PB1  | PA   | HA   | NP   | NA   | M    | NS   |                                  |
| 75        | r1/6/8       | Yellow         | Blue | Blue | Blue | Blue | Blue | Blue | Blue | 7.5                              |
| 115       | r1/2/6/7/8   | Yellow         | Blue | Blue | Blue | Blue | Blue | Blue | Blue | 7.5                              |
| 57        | r2/3/5/7/8   | Blue           | Blue | Blue | Blue | Blue | Blue | Blue | Blue | 7.4                              |
| 67        | r3/6         | Blue           | Blue | Blue | Blue | Blue | Blue | Blue | Blue | 7.4                              |
| 37        | r2/7/8       | Blue           | Blue | Blue | Blue | Blue | Blue | Blue | Blue | 7.3                              |
| 39        | r3/5/8       | Blue           | Blue | Blue | Blue | Blue | Blue | Blue | Blue | 7.3                              |
| 50        | r1/3/7/8     | Blue           | Blue | Blue | Blue | Blue | Blue | Blue | Blue | 7.3                              |
| 51        | r1/5/7/8     | Blue           | Blue | Blue | Blue | Blue | Blue | Blue | Blue | 7.3                              |
| 54        | r2/3/7/8     | Blue           | Blue | Blue | Blue | Blue | Blue | Blue | Blue | 7.3                              |
| 104       | r3/6/7/8     | Blue           | Blue | Blue | Blue | Blue | Blue | Blue | Blue | 7.3                              |
| 126       | r1/2/3/5/6/7 | Blue           | Blue | Blue | Blue | Blue | Blue | Blue | Blue | 7.3                              |
| 38        | r3/5/7       | Blue           | Blue | Blue | Blue | Blue | Blue | Blue | Blue | 7.2                              |
| 80        | r3/5/6       | Blue           | Blue | Blue | Blue | Blue | Blue | Blue | Blue | 7.2                              |
| 85        | r6/7/8       | Blue           | Blue | Blue | Blue | Blue | Blue | Blue | Blue | 7.2                              |
| 86        | r1/2/3/6     | Blue           | Blue | Blue | Blue | Blue | Blue | Blue | Blue | 7.2                              |
| 103       | r3/5/6/8     | Blue           | Blue | Blue | Blue | Blue | Blue | Blue | Blue | 7.2                              |
| 118       | r1/2/3/6/8   | Blue           | Blue | Blue | Blue | Blue | Blue | Blue | Blue | 7.2                              |
| 58        | r1/3/5/7/8   | Blue           | Blue | Blue | Blue | Blue | Blue | Blue | Blue | 7.1                              |
| 78        | r2/6/7       | Blue           | Blue | Blue | Blue | Blue | Blue | Blue | Blue | 7.1                              |
| 88        | r1/2/6/7     | Blue           | Blue | Blue | Blue | Blue | Blue | Blue | Blue | 7.1                              |
| 56        | r3/5/7/8     | Blue           | Blue | Blue | Blue | Blue | Blue | Blue | Blue | 7                                |
| 81        | r3/6/7       | Blue           | Blue | Blue | Blue | Blue | Blue | Blue | Blue | 7                                |

"r" in virus names denotes reassortant. The numbers in virus names indicate gene segments derived from the BJ09 virus as follows: 1, PB2; 2, PB1; 3, PA; 4, HA; 5, NP; 6, NA; 7, M; and 8, NS. The virus segments derived from the HB08 virus were not assigned numbers. Segments derived from BJ09 virus are in yellow, and those derived from HB08 virus are in blue. The virus titers were determined by plaque assay on Madin–Darby canine kidney (MDCK) cells.

**Table S2. Reassortants with moderate replication ability (replication group II)**

| Virus no. | Virus name   | Virus segments |     |    |    |    |    |   |    | Titer (log <sub>10</sub> pfu/mL) |
|-----------|--------------|----------------|-----|----|----|----|----|---|----|----------------------------------|
|           |              | PB2            | PB1 | PA | HA | NP | NA | M | NS |                                  |
| 42        | r1/2/3/5     |                |     |    |    |    |    |   |    | 6.9                              |
| 76        | r2/3/6       |                |     |    |    |    |    |   |    | 6.7                              |
| 87        | r1/2/5/6     |                |     |    |    |    |    |   |    | 6.7                              |
| 106       | r3/5/6/7/8   |                |     |    |    |    |    |   |    | 6.7                              |
| 108       | r2/3/6/7/8   |                |     |    |    |    |    |   |    | 6.7                              |
| 111       | r1/5/6/7/8   |                |     |    |    |    |    |   |    | 6.6                              |
| 9         | r1/5         |                |     |    |    |    |    |   |    | 6.4                              |
| 82        | r3/6/8       |                |     |    |    |    |    |   |    | 6.4                              |
| 84        | r5/6/8       |                |     |    |    |    |    |   |    | 6.4                              |
| 119       | r1/2/3/6/7   |                |     |    |    |    |    |   |    | 6.3                              |
| 90        | r1/3/5/6     |                |     |    |    |    |    |   |    | 6.2                              |
| 17        | r3/7         |                |     |    |    |    |    |   |    | 6.1                              |
| 53        | r2/3/5/8     |                |     |    |    |    |    |   |    | 6                                |
| 83        | r5/6/7       |                |     |    |    |    |    |   |    | 6                                |
| 89        | r1/2/6/8     |                |     |    |    |    |    |   |    | 6                                |
| 36        | r2/5/8       |                |     |    |    |    |    |   |    | 5.9                              |
| 91        | r1/3/6/7     |                |     |    |    |    |    |   |    | 5.8                              |
| 92        | r1/3/6/8     |                |     |    |    |    |    |   |    | 5.7                              |
| 122       | r1/3/5/6/7/8 |                |     |    |    |    |    |   |    | 5.6                              |
| 77        | r2/5/6       |                |     |    |    |    |    |   |    | 5.5                              |
| 123       | r1/2/5/6/7/8 |                |     |    |    |    |    |   |    | 5.5                              |
| 114       | r1/3/5/6/7   |                |     |    |    |    |    |   |    | 5.4                              |
| 79        | r2/6/8       |                |     |    |    |    |    |   |    | 5.3                              |
| 117       | r1/2/5/6/7   |                |     |    |    |    |    |   |    | 5.2                              |
| 105       | r5/6/7/8     |                |     |    |    |    |    |   |    | 5.1                              |
| 74        | r1/6/7       |                |     |    |    |    |    |   |    | 4.9                              |
| 112       | r1/3/6/7/8   |                |     |    |    |    |    |   |    | 4.9                              |
| 101       | r2/6/7/8     |                |     |    |    |    |    |   |    | 4.7                              |
| 120       | r1/2/3/5/6   |                |     |    |    |    |    |   |    | 4.7                              |
| 113       | r1/3/5/6/8   |                |     |    |    |    |    |   |    | 4.6                              |
| 109       | r2/3/5/6/8   |                |     |    |    |    |    |   |    | 4.5                              |
| 116       | r1/2/5/6/8   |                |     |    |    |    |    |   |    | 4.5                              |
| 16        | r3/5         |                |     |    |    |    |    |   |    | 4.2                              |
| 24        | r1/2/7       |                |     |    |    |    |    |   |    | 4.2                              |
| 98        | r2/3/6/8     |                |     |    |    |    |    |   |    | 4                                |

Symbols and nomenclature of reassortant viruses are as described in the legend in [Table S1](#).

**Table S3. Reassortants with low replication ability (replication group III)**

| Virus no. | Virus name   | Virus segments |     |    |    |    |    |   |    | Titer (log <sub>10</sub> pfu/mL) |
|-----------|--------------|----------------|-----|----|----|----|----|---|----|----------------------------------|
|           |              | PB2            | PB1 | PA | HA | NP | NA | M | NS |                                  |
| 95        | r1/6/7/8     |                |     |    |    |    |    |   |    | 3.7                              |
| 12        | r2/3         |                |     |    |    |    |    |   |    | 3.6                              |
| 94        | r1/5/6/8     |                |     |    |    |    |    |   |    | 3.6                              |
| 121       | r2/3/5/6/7/8 |                |     |    |    |    |    |   |    | 3.6                              |
| 100       | r2/5/6/8     |                |     |    |    |    |    |   |    | 3.2                              |

Symbols and nomenclature of reassortant viruses are as described in the legend in [Table S1](#).

**Table S4. Nonviable reassortants (replication group IV)**

| Virus no. | Virus name | Virus segments |     |    |    |    |    |   | Titer (log <sub>10</sub> pfu/mL) |
|-----------|------------|----------------|-----|----|----|----|----|---|----------------------------------|
|           |            | PB2            | PB1 | PA | HA | NP | NA | M |                                  |
| 10        | r1/7       |                |     |    |    |    |    |   | 0                                |
| 13        | r2/5       |                |     |    |    |    |    |   | 0                                |
| 14        | r2/7       |                |     |    |    |    |    |   | 0                                |
| 32        | r2/3/5     |                |     |    |    |    |    |   | 0                                |
| 35        | r2/5/7     |                |     |    |    |    |    |   | 0                                |
| 52        | r2/3/5/7   |                |     |    |    |    |    |   | 0                                |
| 93        | r1/5/6/7   |                |     |    |    |    |    |   | 0                                |
| 96        | r2/3/5/6   |                |     |    |    |    |    |   | 0                                |
| 97        | r2/3/6/7   |                |     |    |    |    |    |   | 0                                |
| 99        | r2/5/6/7   |                |     |    |    |    |    |   | 0                                |
| 102       | r3/5/6/7   |                |     |    |    |    |    |   | 0                                |
| 107       | r2/5/6/7/8 |                |     |    |    |    |    |   | 0                                |
| 110       | r2/3/5/6/7 |                |     |    |    |    |    |   | 0                                |

Symbols and nomenclature of reassortant viruses are as described in the legend in [Table S1](#).

**Table S5. Effect of a single genomic segment from BJ09 virus on the replication of reassortants in vitro**

| Segment of BJ09 origin | Significance | Effect on the replication of reassortants |
|------------------------|--------------|-------------------------------------------|
| PB2                    | $P < 0.01$   | +                                         |
| PB1                    | $P < 0.01$   | -                                         |
| PA                     | $P > 0.05$   | None                                      |
| NP                     | $P < 0.01$   | -                                         |
| NA                     | $P < 0.01$   | -                                         |
| M                      | $P < 0.01$   | -                                         |
| NS                     | $P < 0.05$   | +                                         |

"+" indicates that the corresponding segment of BJ09 origin enhances the replication ability of the reassortants in MDCK cells; "-" indicates that the corresponding segment of BJ09 origin reduces the replication ability of the reassortants; "None" indicates that the corresponding segment of BJ09 origin had no significant effect on the replication ability of the reassortants.

**Table S6. The interaction between two segments for the replication of reassortants in vitro**

| Segment that was affected | BJ09 segment that was affected on the corresponding segment | Significance | Effect on the replication of reassortants |
|---------------------------|-------------------------------------------------------------|--------------|-------------------------------------------|
| HB08 PB2                  | BJ09 PB1                                                    | $P < 0.01$   | –                                         |
|                           | BJ09 PA                                                     | $P > 0.05$   | None                                      |
|                           | BJ09 NP                                                     | $P < 0.01$   | –                                         |
|                           | BJ09 NA                                                     | $P > 0.05$   | None                                      |
|                           | BJ09 M                                                      | $P > 0.05$   | None                                      |
|                           | BJ09 NS                                                     | $P < 0.05$   | +                                         |
| HB08 PB1                  | BJ09 PB2                                                    | $P > 0.05$   | None                                      |
|                           | BJ09 PA                                                     | $P > 0.05$   | None                                      |
|                           | BJ09 NP                                                     | $P > 0.05$   | None                                      |
|                           | BJ09 NA                                                     | $P < 0.01$   | –                                         |
|                           | BJ09 M                                                      | $P < 0.05$   | –                                         |
|                           | BJ09 NS                                                     | $P > 0.05$   | None                                      |
| HB08 PA                   | BJ09 PB2                                                    | $P > 0.05$   | None                                      |
|                           | BJ09 PB1                                                    | $P > 0.05$   | None                                      |
|                           | BJ09 NP                                                     | $P < 0.05$   | –                                         |
|                           | BJ09 NA                                                     | $P < 0.05$   | –                                         |
|                           | BJ09 M                                                      | $P < 0.01$   | –                                         |
|                           | BJ09 NS                                                     | $P > 0.05$   | None                                      |
| HB08 NP                   | BJ09 PB2                                                    | $P > 0.05$   | None                                      |
|                           | BJ09 PB1                                                    | $P > 0.05$   | None                                      |
|                           | BJ09 PA                                                     | $P > 0.05$   | None                                      |
|                           | BJ09 NA                                                     | $P > 0.05$   | None                                      |
|                           | BJ09 M                                                      | $P < 0.05$   | –                                         |
|                           | BJ09 NS                                                     | $P > 0.05$   | None                                      |
| HB08 NA                   | BJ09 PB2                                                    | $P > 0.05$   | None                                      |
|                           | BJ09 PB1                                                    | $P < 0.05$   | –                                         |
|                           | BJ09 PA                                                     | $P > 0.05$   | None                                      |
|                           | BJ09 NP                                                     | $P > 0.05$   | None                                      |
|                           | BJ09 M                                                      | $P > 0.05$   | None                                      |
|                           | BJ09 NS                                                     | $P < 0.01$   | +                                         |
| HB08 M                    | BJ09 PB2                                                    | $P < 0.05$   | +                                         |
|                           | BJ09 PB1                                                    | $P < 0.01$   | –                                         |
|                           | BJ09 PA                                                     | $P > 0.05$   | None                                      |
|                           | BJ09 NP                                                     | $P < 0.01$   | –                                         |
|                           | BJ09 NA                                                     | $P < 0.05$   | –                                         |
|                           | BJ09 NS                                                     | $P > 0.05$   | None                                      |
| HB08 NS                   | BJ09 PB2                                                    | $P > 0.05$   | None                                      |
|                           | BJ09 PB1                                                    | $P < 0.05$   | –                                         |
|                           | BJ09 PA                                                     | $P > 0.05$   | None                                      |
|                           | BJ09 NP                                                     | $P < 0.01$   | –                                         |
|                           | BJ09 NA                                                     | $P > 0.05$   | None                                      |
|                           | BJ09 M                                                      | $P < 0.05$   | –                                         |
| BJ09 PB2                  | BJ09 PB1                                                    | $P < 0.05$   | +                                         |
|                           | BJ09 PA                                                     | $P > 0.05$   | None                                      |
|                           | BJ09 NP                                                     | $P > 0.05$   | None                                      |
|                           | BJ09 NA                                                     | $P < 0.01$   | –                                         |
|                           | BJ09 M                                                      | $P > 0.05$   | None                                      |
|                           | BJ09 NS                                                     | $P > 0.05$   | None                                      |
| BJ09 PB1                  | BJ09 PB2                                                    | $P < 0.01$   | +                                         |
|                           | BJ09 PA                                                     | $P > 0.05$   | None                                      |
|                           | BJ09 NP                                                     | $P < 0.01$   | –                                         |
|                           | BJ09 PB1A6                                                  | $P > 0.05$   | None                                      |
|                           | BJ09 M                                                      | $P > 0.05$   | None                                      |
|                           | BJ09 NS                                                     | $P < 0.01$   | +                                         |

Table S6. Cont.

| Segment that was affected | BJ09 segment that was affected on the corresponding segment | Significance | Effect on the replication of reassortants |
|---------------------------|-------------------------------------------------------------|--------------|-------------------------------------------|
| BJ09 PA                   | BJ09 PB2                                                    | $P < 0.01$   | +                                         |
|                           | BJ09 PB1                                                    | $P > 0.05$   | None                                      |
|                           | BJ09 NP                                                     | $P < 0.01$   | -                                         |
|                           | BJ09 NA                                                     | $P < 0.01$   | -                                         |
|                           | BJ09 M                                                      | $P > 0.05$   | None                                      |
|                           | BJ09 NS                                                     | $P < 0.05$   | +                                         |
| BJ09 NP                   | BJ09 PB2                                                    | $P < 0.01$   | +                                         |
|                           | BJ09 PB1                                                    | $P < 0.05$   | -                                         |
|                           | BJ09 PA                                                     | $P > 0.05$   | None                                      |
|                           | BJ09 NA                                                     | $P < 0.01$   | -                                         |
|                           | BJ09 M                                                      | $P > 0.05$   | None                                      |
|                           | BJ09 NS                                                     | $P < 0.05$   | +                                         |
| BJ09 NA                   | BJ09 PB2                                                    | $P > 0.05$   | None                                      |
|                           | BJ09 PB1                                                    | $P > 0.05$   | None                                      |
|                           | BJ09 PA                                                     | $P > 0.05$   | None                                      |
|                           | BJ09 NP                                                     | $P < 0.01$   | -                                         |
|                           | BJ09 M                                                      | $P < 0.05$   | -                                         |
|                           | BJ09 NS                                                     | $P > 0.05$   | None                                      |
| BJ09 M                    | BJ09 PB2                                                    | $P > 0.05$   | None                                      |
|                           | BJ09 PB1                                                    | $P > 0.05$   | None                                      |
|                           | BJ09 PA                                                     | $P > 0.05$   | None                                      |
|                           | BJ09 NP                                                     | $P > 0.05$   | None                                      |
|                           | BJ09 NA                                                     | $P < 0.05$   | -                                         |
|                           | BJ09 NS                                                     | $P < 0.01$   | +                                         |
| BJ09 NS                   | BJ09 PB2                                                    | $P > 0.05$   | None                                      |
|                           | BJ09 PB1                                                    | $P > 0.05$   | None                                      |
|                           | BJ09 PA                                                     | $P > 0.05$   | None                                      |
|                           | BJ09 NP                                                     | $P < 0.01$   | -                                         |
|                           | BJ09 NA                                                     | $P < 0.01$   | -                                         |
|                           | BJ09 M                                                      | $P > 0.05$   | None                                      |

"+" indicates that the corresponding segment of BJ09 origin enhances the replication ability of the reassortants in MDCK cells; "-" indicates that the corresponding segment of BJ09 origin reduces the replication ability of the reassortants; "None" indicates that the corresponding segment of BJ09 origin had no significant effect on the replication ability of the reassortants.

**Table S7. Infectivity and replication ability of reassortants in mice**

| Virus no. | Virus name   | Virus segments |     |    |    |    |    |   |    | MID <sub>50</sub><br>(log <sub>10</sub> pfu) | Virus titer<br>(pfu/mL ± SD) |                    |
|-----------|--------------|----------------|-----|----|----|----|----|---|----|----------------------------------------------|------------------------------|--------------------|
|           |              | PB2            | PB1 | PA | HA | NP | NA | M | NS |                                              | Lung                         | Nasal<br>turbinate |
|           | HB08 WT      |                |     |    |    |    |    |   |    | <1.0                                         | 7.8 ± 0.1                    | 6.9 ± 0.5          |
|           | BJ09 WT      |                |     |    |    |    |    |   |    | <1.0                                         | 7.2 ± 0.4                    | 6.7 ± 0.7          |
| 1         | r1           |                |     |    |    |    |    |   |    | <1.0                                         | 6.8 ± 0.5                    | 6.1 ± 0.5          |
| 2         | r2           |                |     |    |    |    |    |   |    | <1.0                                         | 7.9 ± 0.4                    | 6.5 ± 0.4          |
| 3         | r3           |                |     |    |    |    |    |   |    | <1.0                                         | 7.7 ± 0.4                    | 6.7 ± 0.3          |
| 4         | r5           |                |     |    |    |    |    |   |    | <1.0                                         | 7.8 ± 0.2                    | 6.6 ± 0.4          |
| 5         | r7           |                |     |    |    |    |    |   |    | <1.0                                         | 5.2 ± 0.1                    | 4.0 ± 0.4          |
| 6         | r8           |                |     |    |    |    |    |   |    | <1.0                                         | 5.3 ± 0.2                    | 4.1 ± 0.1          |
| 7         | r1/2         |                |     |    |    |    |    |   |    | <1.0                                         | 5.7 ± 0.2                    | 4.8 ± 0.5          |
| 8         | r1/3         |                |     |    |    |    |    |   |    | <1.0                                         | 5.1 ± 0.9                    | 5.1 ± 0.3          |
| 11        | r1/8         |                |     |    |    |    |    |   |    | <1.0                                         | 4.5 ± 0.3                    | 3.6 ± 0.1          |
| 15        | r2/8         |                |     |    |    |    |    |   |    | <1.0                                         | 4.7 ± 0.4                    | 4.2 ± 0.5          |
| 18        | r3/8         |                |     |    |    |    |    |   |    | <1.0                                         | 5.9 ± 0.1                    | 4.7 ± 0.1          |
| 19        | r5/7         |                |     |    |    |    |    |   |    | <1.0                                         | 6.8 ± 0.5                    | 5.9 ± 0.7          |
| 20        | r5/8         |                |     |    |    |    |    |   |    | <1.0                                         | 6.9 ± 0.1                    | 6.2 ± 0.9          |
| 21        | r7/8         |                |     |    |    |    |    |   |    | <1.0                                         | 5.8 ± 0.4                    | 4.6 ± 0.1          |
| 22        | r1/2/3       |                |     |    |    |    |    |   |    | <1.0                                         | 6.0 ± 1.2                    | 4.8 ± 0.4          |
| 23        | r1/2/5       |                |     |    |    |    |    |   |    | <1.0                                         | 5.6 ± 0.3                    | 5.4 ± 0.3          |
| 25        | r1/2/8       |                |     |    |    |    |    |   |    | <1.0                                         | 5.4 ± 0.4                    | 5.2 ± 0.2          |
| 26        | r1/3/5       |                |     |    |    |    |    |   |    | <1.0                                         | 4.7 ± 0.6                    | 3.8 ± 0.1          |
| 27        | r1/3/7       |                |     |    |    |    |    |   |    | <1.0                                         | 5.2 ± 0.1                    | 5.0 ± 0.1          |
| 28        | r1/3/8       |                |     |    |    |    |    |   |    | <1.0                                         | 3.9 ± 0.1                    | 4.2 ± 0.2          |
| 29        | r1/5/7       |                |     |    |    |    |    |   |    | <1.0                                         | 5.7 ± 0.4                    | 5.3 ± 0.3          |
| 30        | r1/5/8       |                |     |    |    |    |    |   |    | <1.0                                         | 5.6 ± 0.3                    | 5.4 ± 0.4          |
| 31        | r1/7/8       |                |     |    |    |    |    |   |    | <1.0                                         | 5.4 ± 0.3                    | 5.2 ± 0.6          |
| 33        | r2/3/7       |                |     |    |    |    |    |   |    | <1.0                                         | 5.7 ± 0.5                    | 5.0 ± 0.1          |
| 34        | r2/3/8       |                |     |    |    |    |    |   |    | <1.0                                         | 5.8 ± 0.2                    | 3.9 ± 0.7          |
| 37        | r2/7/8       |                |     |    |    |    |    |   |    | <1.0                                         | 6.0 ± 0.3                    | 5.9 ± 0.4          |
| 38        | r3/5/7       |                |     |    |    |    |    |   |    | <1.0                                         | 7.1 ± 0.4                    | 6.1 ± 0.3          |
| 39        | r3/5/8       |                |     |    |    |    |    |   |    | 1.3                                          | 6.2 ± 0.2                    | 4.0 ± 0.3          |
| 40        | r3/7/8       |                |     |    |    |    |    |   |    | <1.0                                         | 6.3 ± 0.1                    | 5.2 ± 0.1          |
| 41        | r5/7/8       |                |     |    |    |    |    |   |    | <1.0                                         | 4.9 ± 0.1                    | 4.2 ± 0.2          |
| 43        | r1/2/3/7     |                |     |    |    |    |    |   |    | <1.0                                         | 6.3 ± 0.7                    | 6.2 ± 0.1          |
| 44        | r1/2/3/8     |                |     |    |    |    |    |   |    | <1.0                                         | 5.5 ± 0.1                    | 3.8 ± 0.9          |
| 45        | r1/2/5/7     |                |     |    |    |    |    |   |    | <1.0                                         | 4.5 ± 0.5                    | 4.6 ± 0.3          |
| 46        | r1/2/5/8     |                |     |    |    |    |    |   |    | <1.0                                         | 4.4 ± 0.1                    | 3.2 ± 0.4          |
| 47        | r1/2/7/8     |                |     |    |    |    |    |   |    | <1.0                                         | 5.2 ± 0.1                    | 4.3 ± 0.1          |
| 48        | r1/3/5/7     |                |     |    |    |    |    |   |    | <1.0                                         | 6.6 ± 1.2                    | 5.7 ± 0.9          |
| 49        | r1/3/5/8     |                |     |    |    |    |    |   |    | <1.0                                         | 4.5 ± 0.4                    | 4.3 ± 0.1          |
| 50        | r1/3/7/8     |                |     |    |    |    |    |   |    | <1.0                                         | 4.0 ± 0.5                    | 4.2 ± 0.2          |
| 51        | r1/5/7/8     |                |     |    |    |    |    |   |    | 1.8                                          | 4.2 ± 0.1                    | 2.9 ± 0.1          |
| 54        | r2/3/7/8     |                |     |    |    |    |    |   |    | <1.0                                         | 5.4 ± 0.5                    | 4.0 ± 0.1          |
| 55        | r2/5/7/8     |                |     |    |    |    |    |   |    | 1.3                                          | 4.3 ± 0.6                    | 3.7 ± 0.2          |
| 56        | r3/5/7/8     |                |     |    |    |    |    |   |    | <1.0                                         | 5.6 ± 0.1                    | 5.0 ± 0.4          |
| 57        | r2/3/5/7/8   |                |     |    |    |    |    |   |    | <1.0                                         | 4.9 ± 0.3                    | 3.6 ± 0.1          |
| 58        | r1/3/5/7/8   |                |     |    |    |    |    |   |    | <1.0                                         | 4.1 ± 1.2                    | 3.3 ± 0.1          |
| 59        | r1/2/5/7/8   |                |     |    |    |    |    |   |    | <1.0                                         | 4.6 ± 0.3                    | 4.2 ± 0.1          |
| 60        | r1/2/3/7/8   |                |     |    |    |    |    |   |    | <1.0                                         | 4.9 ± 0.4                    | 4.3 ± 0.3          |
| 61        | r1/2/3/5/8   |                |     |    |    |    |    |   |    | <1.0                                         | 4.5 ± 0.1                    | 3.1 ± 0.1          |
| 62        | r1/2/3/5/7   |                |     |    |    |    |    |   |    | <1.0                                         | 5.1 ± 0.1                    | 3.5 ± 0.4          |
| 63        | r1/2/3/5/7/8 |                |     |    |    |    |    |   |    | <1.0                                         | 5.8 ± 1.0                    | 4.5 ± 0.1          |
| 64        | r6           |                |     |    |    |    |    |   |    | <1.0                                         | 5.3 ± 0.4                    | 5.3 ± 0.7          |
| 65        | r1/6         |                |     |    |    |    |    |   |    | <1.0                                         | 4.1 ± 0.5                    | 3.4 ± 0.4          |
| 66        | r2/6         |                |     |    |    |    |    |   |    | 1.3                                          | 5.2 ± 1.0                    | 3.2 ± 0.3          |
| 67        | r3/6         |                |     |    |    |    |    |   |    | <1.0                                         | 7.0 ± 0.3                    | 4.9 ± 0.5          |
| 68        | r5/6         |                |     |    |    |    |    |   |    | <1.0                                         | 5.2 ± 0.3                    | 3.6 ± 0.5          |
| 69        | r6/7         |                |     |    |    |    |    |   |    | <1.0                                         | 4.4 ± 0.3                    | 4.2 ± 0.5          |
| 70        | r6/8         |                |     |    |    |    |    |   |    | <1.0                                         | 5.5 ± 0.6                    | 4.0 ± 0.7          |
| 71        | r1/2/6       |                |     |    |    |    |    |   |    | <1.0                                         | 4.7 ± 0.4                    | 4.2 ± 0.3          |

**Table S7. Cont.**

| Virus no. | Virus name     | Virus segments |     |    |    |    |    |   |    | Virus titer<br>(pfu/mL ± SD)                 |           |                    |
|-----------|----------------|----------------|-----|----|----|----|----|---|----|----------------------------------------------|-----------|--------------------|
|           |                | PB2            | PB1 | PA | HA | NP | NA | M | NS | MID <sub>50</sub><br>(log <sub>10</sub> pfu) | Lung      | Nasal<br>turbinate |
| 72        | r1/3/6         |                |     |    |    |    |    |   |    | <1.0                                         | 4.5 ± 0.5 | 4.1 ± 0.4          |
| 73        | r1/5/6         |                |     |    |    |    |    |   |    | <1.0                                         | 5.2 ± 0.3 | 4.9 ± 0.7          |
| 75        | r1/6/8         |                |     |    |    |    |    |   |    | <1.0                                         | 4.1 ± 0.1 | 3.8 ± 0.4          |
| 78        | r2/6/7         |                |     |    |    |    |    |   |    | <1.0                                         | 4.4 ± 0.1 | 4.0 ± 0.1          |
| 80        | r3/5/6         |                |     |    |    |    |    |   |    | <1.0                                         | 6.6 ± 1.0 | 5.9 ± 0.9          |
| 85        | r6/7/8         |                |     |    |    |    |    |   |    | <1.0                                         | 7.2 ± 0.5 | 4.3 ± 0.5          |
| 86        | r1/2/3/6       |                |     |    |    |    |    |   |    | <1.0                                         | 6.3 ± 0.3 | 6.2 ± 0.6          |
| 88        | r1/2/6/7       |                |     |    |    |    |    |   |    | <1.0                                         | 3.7 ± 0.9 | 3.2 ± 0.4          |
| 103       | r3/5/6/8       |                |     |    |    |    |    |   |    | <1.0                                         | 7.0 ± 0.4 | 5.0 ± 0.2          |
| 104       | r3/6/7/8       |                |     |    |    |    |    |   |    | <1.0                                         | 7.1 ± 0.8 | 4.8 ± 0.4          |
| 115       | r1/2/6/7/8     |                |     |    |    |    |    |   |    | <1.0                                         | 5.8 ± 0.8 | 4.2 ± 0.5          |
| 118       | r1/2/3/6/8     |                |     |    |    |    |    |   |    | <1.0                                         | 6.1 ± 0.3 | 3.2 ± 0.1          |
| 124       | r1/2/3/6/7/8   |                |     |    |    |    |    |   |    | <1.0                                         | 6.7 ± 0.3 | 4.5 ± 0.3          |
| 125       | r1/2/3/5/6/8   |                |     |    |    |    |    |   |    | <1.0                                         | 5.5 ± 0.8 | 4.5 ± 0.7          |
| 126       | r1/2/3/5/6/7   |                |     |    |    |    |    |   |    | <1.0                                         | 7.5 ± 0.3 | 4.2 ± 0.1          |
| 127       | r1/2/3/5/6/7/8 |                |     |    |    |    |    |   |    | <1.0                                         | 6.5 ± 0.5 | 6.3 ± 0.2          |

Virus titers in lung and nasal turbinate are means ± SDs of the log<sub>10</sub> pfu/mL on day 4 postinfection of three mice infected with 10<sup>4</sup> pfu.

**Table S8. Contribution of BJ09 PA to the pathogenicity of reassortants**

| Effect of BJ09 PA on pathogenicity | Viruses without BJ09 PA |            |                                             |                 |            | Viruses with BJ09 PA |              |                                             |                 |            |
|------------------------------------|-------------------------|------------|---------------------------------------------|-----------------|------------|----------------------|--------------|---------------------------------------------|-----------------|------------|
|                                    | Virus no.               | Virus name | LD <sub>50</sub><br>(log <sub>10</sub> pfu) | Weight loss (%) | MST (days) | Virus no.            | Virus name   | LD <sub>50</sub><br>(log <sub>10</sub> pfu) | Weight loss (%) | MST (days) |
| Enhanced                           |                         | HB08 WT    | ≥5.5                                        | 8.1             | >14        | 3                    | r3           | 4.3                                         | >20             | 6          |
|                                    | 19                      | r5/7       | ≥5.5                                        | 0               | >14        | 38                   | r3/5/7       | 2.8                                         | >20             | 6          |
|                                    | 64                      | r6         | 4.8                                         | 13.2            | 9          | 67                   | r3/6         | 3.3                                         | >20             | 5          |
|                                    | 85                      | r6/7/8     | 4.8                                         | 11.9            | 8.7        | 104                  | r3/6/7/8     | 2.8                                         | >20             | 6.7        |
|                                    | 1                       | r1         | ≥5.5                                        | 4               | >14        | 8                    | r1/3         | 5.3                                         | 9.5             | 12         |
|                                    | 21                      | r7/8       | ≥5.5                                        | 0               | >14        | 40                   | r3/7/8       | 4.8                                         | 17.9            | 8          |
|                                    | 29                      | r1/5/7     | ≥5.5                                        | 7.9             | >14        | 48                   | r1/3/5/7     | 5.3                                         | 8.7             | 12         |
|                                    | 51                      | r1/5/7/8   | ≥5.5                                        | 3.8             | >14        | 58                   | r1/3/5/7/8   | 4.8                                         | 18.8            | 9.7        |
|                                    | 115                     | r1/2/6/7/8 | 4.8                                         | 13.9            | 10         | 124                  | r1/2/3/6/7/8 | 4.8                                         | 15.8            | 9.7        |
|                                    | 30                      | r1/5/8     | ≥5.5                                        | 0               | >14        | 49                   | r1/3/5/8     | ≥5.5                                        | 6.1             | >14        |
| 31                                 | r1/7/8                  | ≥5.5       | 0                                           | >14             | 50         | r1/3/7/8             | ≥5.5         | 6.5                                         | >14             |            |
| Attenuated                         | 11                      | r1/8       | 4.8                                         | 19.7            | 7.7        | 28                   | r1/3/8       | ≥5.5                                        | 0               | >14        |
|                                    | 15                      | r2/8       | ≥5.5                                        | 6.6             | >14        | 34                   | r2/3/8       | ≥5.5                                        | 0               | >14        |

This table was derived from Tables 1–4 and was used to evaluate the contribution of BJ09 PA to the pathogenicity of the reassortant viruses. Pairs of reassortants with or without BJ09 PA are listed. The pathogenicity of the two viruses in each pair was compared. “Enhanced” indicates that the pathogenicity of viruses was enhanced after introduction of BJ09 PA; “Attenuated” indicates that the pathogenicity of viruses was attenuated after introduction of BJ09 PA. LD<sub>50</sub>, 50% mouse lethal dose. MST, mean survival time.



**Table S9. Contribution of BJ09 PB1 to the pathogenicity of reassortants**

| Effect of BJ09 PB1 on pathogenicity | Viruses without BJ09 PB1 |            |                                          |                 |            | Viruses with BJ09 PB1 |              |                                          |                 |            |     |
|-------------------------------------|--------------------------|------------|------------------------------------------|-----------------|------------|-----------------------|--------------|------------------------------------------|-----------------|------------|-----|
|                                     | Virus no.                | Virus name | LD <sub>50</sub> (log <sub>10</sub> pfu) | Weight loss (%) | MST (days) | Virus no.             | Virus name   | LD <sub>50</sub> (log <sub>10</sub> pfu) | Weight loss (%) | MST (days) |     |
| Attenuated                          | 8                        | r1/3       | 5.3                                      | 9.5             | 12         | 22                    | r1/2/3       | ≥5.5                                     | 0               | >14        |     |
|                                     | 11                       | r1/8       | 4.8                                      | 19.7            | 7.7        | 25                    | r1/2/8       | ≥5.5                                     | 0               | >14        |     |
|                                     | 40                       | r3/7/8     | 4.8                                      | 17.9            | 8          | 54                    | r2/3/7/8     | ≥5.5                                     | 0               | >14        |     |
|                                     | 48                       | r1/3/5/7   | 5.3                                      | 8.7             | 12         | 62                    | r1/2/3/5/7   | ≥5.5                                     | 0               | >14        |     |
|                                     | 58                       | r1/3/5/7/8 | 4.8                                      | 18.8            | 9.7        | 63                    | r1/2/3/5/7/8 | ≥5.5                                     | 2.9             | >14        |     |
|                                     | 64                       | r6         | 4.8                                      | 13.2            | 9          | 66                    | r2/6         | ≥5.5                                     | 0               | >14        |     |
|                                     | 29                       | r1/5/7     | ≥5.5                                     | 7.9             | >14        | 45                    | r1/2/5/7     | ≥5.5                                     | 0               | >14        |     |
|                                     | 41                       | r5/7/8     | ≥5.5                                     | 5.6             | >14        | 55                    | r2/5/7/8     | ≥5.5                                     | 2.2             | >14        |     |
|                                     | 49                       | r1/3/5/8   | ≥5.5                                     | 6.1             | >14        | 61                    | r1/2/3/5/8   | ≥5.5                                     | 0               | >14        |     |
|                                     | 50                       | r1/3/7/8   | ≥5.5                                     | 6.5             | >14        | 60                    | r1/2/3/7/8   | ≥5.5                                     | 0               | >14        |     |
|                                     | 69                       | r6/7       | ≥5.5                                     | 10.4            | >14        | 78                    | r2/6/7       | ≥5.5                                     | 0.8             | >14        |     |
|                                     |                          |            | HB08 WT                                  | ≥5.5            | 8.1        | >14                   | 2            | r2                                       | ≥5.5            | 4.1        | >14 |
|                                     | Enhanced                 | 6          | r8                                       | ≥5.5            | 2.1        | >14                   | 15           | r2/8                                     | ≥5.5            | 6.6        | >14 |

This table was derived from Tables 1–4 and was used to evaluate the contribution of BJ09 PB1 to the pathogenicity of the reassortant viruses. Pairs of reassortants with or without BJ09 PB1 are listed. The pathogenicity of the two viruses in each pair was compared. Enhanced, means the pathogenicity of viruses were enhanced after introduction of BJ09 PB1; Attenuate, means the pathogenicity of viruses were attenuated after introduction of BJ09 PB1. LD<sub>50</sub>, 50% mouse lethal dose. MST, mean survival time.

**Table S10. Contribution of BJ09 NA to the pathogenicity of reassortants**

| Effect of BJ09 NA on pathogenicity | Viruses without BJ09 NA |              |                                          |                 |            | Viruses contained with BJ09 NA |                |                                          |                 |            |   |
|------------------------------------|-------------------------|--------------|------------------------------------------|-----------------|------------|--------------------------------|----------------|------------------------------------------|-----------------|------------|---|
|                                    | Virus no.               | Virus name   | LD <sub>50</sub> (log <sub>10</sub> pfu) | Weight loss (%) | MST (days) | Virus no.                      | Virus name     | LD <sub>50</sub> (log <sub>10</sub> pfu) | Weight loss (%) | MST (days) |   |
| Enhanced                           | 3                       | r3           | 4.3                                      | >20             | 6          | 67                             | r3/6           | 3.3                                      | >20             | 5          |   |
|                                    | 39                      | r3/5/8       | ≥5.5                                     | 4.7             | >14        | 103                            | r3/5/6/8       | 4.3                                      | >20             | 6          |   |
|                                    | 40                      | r3/7/8       | 4.8                                      | 17.9            | 8          | 104                            | r3/6/7/8       | 2.8                                      | >20             | 6.7        |   |
|                                    | 62                      | r1/2/3/5/7   | ≥5.5                                     | 0               | >14        | 126                            | r1/2/3/5/6/7   | 2.8                                      | >20             | 7          |   |
|                                    |                         |              | HB08 WT                                  | ≥5.5            | 8.1        | >14                            | 64             | r6                                       | 4.8             | 13.2       | 9 |
|                                    | 6                       | r8           | ≥5.5                                     | 2.1             | >14        | 70                             | r6/8           | 4.8                                      | 19.4            | 10         |   |
|                                    | 21                      | r7/8         | ≥5.5                                     | 0               | >14        | 85                             | r6/7/8         | 4.8                                      | 11.9            | 8.7        |   |
|                                    | 47                      | r1/2/7/8     | ≥5.5                                     | 0               | >14        | 115                            | r1/2/6/7/8     | 4.8                                      | 13.9            | 10         |   |
|                                    | 60                      | r1/2/3/7/8   | ≥5.5                                     | 0               | >14        | 124                            | r1/2/3/6/7/8   | 4.8                                      | 15.8            | 9.7        |   |
|                                    | 61                      | r1/2/3/5/8   | ≥5.5                                     | 0               | >14        | 125                            | r1/2/3/5/6/8   | 5.3                                      | 8.3             | 12.3       |   |
|                                    | 63                      | r1/2/3/5/7/8 | ≥5.5                                     | 2.9             | >14        | 127                            | r1/2/3/5/6/7/8 | 4.5                                      | >20             | 6.7        |   |
|                                    | 4                       | r5           | ≥5.5                                     | 0               | >14        | 68                             | r5/6           | ≥5.5                                     | 5.7             | >14        |   |
|                                    | 5                       | r7           | ≥5.5                                     | 0               | >14        | 69                             | r6/7           | ≥5.5                                     | 10.4            | >14        |   |
|                                    | 44                      | r1/2/3/8     | ≥5.5                                     | 4.3             | >14        | 118                            | r1/2/3/6/8     | ≥5.5                                     | 8.3             | >14        |   |
| Attenuated                         | 8                       | r1/3         | 5.3                                      | 9.5             | 12         | 72                             | r1/3/6         | ≥5.5                                     | 0               | >14        |   |
|                                    | 11                      | r1/8         | 4.8                                      | 19.7            | 7.7        | 75                             | r1/6/8         | ≥5.5                                     | 0               | >14        |   |

This table was derived from Tables 1–4 and was used to evaluate the contribution of BJ09 NA to the pathogenicity of the reassortant viruses. Pairs of reassortants with or without BJ09 NA are listed. The pathogenicity of the two viruses in each pair was compared. “Enhanced” indicates that the pathogenicity of viruses was enhanced after introduction of BJ09 NA; “Attenuated” indicates that the pathogenicity of viruses was attenuated after introduction of BJ09 NA. LD<sub>50</sub>, 50% mouse lethal dose. MST, mean survival time.
